# Determination of earthquake energy release in the Eastern Mediterranean region

A. Hofstetter and A. Shapira

Seismology Division, the Geophysical Institute of Israel, PO Box 182, Lod 71100, Israel

Accepted 2000 July 18. Received 2000 July 17; in original form 1999 January 12

## SUMMARY

Seismic energy radiated by earthquakes in the Eastern Mediterranean region is estimated using the short-period (50 samples per second) seismic recordings made by the Israel Seismic Network during 1990–1997. Our data set is the whole  $S$ -wave window (from  $S_n$  until  $L_g$  falls to less than twice the noise level) from 133 earthquakes with a high signal-to-noise ratio. We obtained the attenuation function  $(1.850 \pm 0.005) \log R + (0.00460 + 0.00005)R \log e + 0.05$ , where the distance range is  $50 \leq R \leq 1500$  km. We tested the dependence of the attenuation function on the azimuth and the distance. Despite the different propagation paths of the waves travelling through the continental crust of the Arabian Shield to the east or the intermediate crust of the Mediterranean Sea to the west, we show that from a statistical point of view the attenuation functions are similar. The energy estimation involves time-domain integration of the squared ground-motion velocity, assuming that the attenuation is known, following the method of Kanamori *et al.* (1993). For the magnitude range  $3.0 \leq m_B \leq 6.2$  (magnitude determined by the National Earthquake Information Service, NEIS), we obtained the magnitude–energy relationship  $\log E_0 = (2.09 \pm 0.10)m_B + (8.86 \pm 0.42)$ . Comparison of the seismic energy and the seismic moment suggests that  $E \propto M_0^{0.19}$  and that Orowan's stress drop increases as  $M_0^{0.19}$ . A refinement of the results is expected with the application of the method of Mayeda & Walter (1996) for energy estimation from coda envelopes using a large data set of broad-band observations.

**Key words:** attenuation, earthquakes, Eastern Mediterranean, energy release.

## INTRODUCTION

The energy release of an earthquake is an important physical quantity that describes the earthquake. Many studies, employing various methods, have attempted to use the observed seismograms for the estimation of seismic energy (e.g. Gutenberg & Richter 1942, 1956a,b; Bath 1966; Thatcher & Hanks 1973; Boatwright & Choy 1986; Singh & Ordaz 1994; Lindenzfeld & Berckhemer 1995; Mayeda & Walter 1996). Shaw (1998) examined the scaling of radiated energy as a function of moment and rupture length, assuming various simple elastodynamic fault models. A commonly used energy–magnitude relationship is  $\log E_S = 1.5M_S + 11.8$ , where  $E_S$  is in ergs and  $M_S$  is the surface wave magnitude (Gutenberg & Richter 1956a). Recently, Kanamori *et al.* (1993) presented a method for the estimation of the seismic energy based on time-domain integration of local and regional velocity-squared seismograms observed at TERRAscope in southern California. They were able to obtain reliable energy estimation, since the propagation effect is of minor importance at short distances.

Although broad-band digital recordings of local and regional earthquakes have become more common in the Middle East

and the Eastern Mediterranean region, there is a wealth of short-period digital recordings, made over a longer time period, and from sources more numerous and better distributed in azimuth and epicentral distance than the rather limited data set of the broad-band observations. Thus we take advantage of the large short-period data set in estimating the energy of local and regional observations (Fig. 1a), which includes small to moderate events as well. As a consequence of the wealth of short-period observations, we can be very selective in choosing only high-quality data. Our energy estimation, as explained below, is based on the method of Kanamori *et al.* (1993) using short-period data.

Recently, Mayeda & Walter (1996) proposed estimating the energy from the coda envelopes using broad-band data at different frequency ranges. The method of Mayeda & Walter (1996) is indeed better than that of Kanamori *et al.* (1993). However, one can still get an insight into earthquake energy release in the Eastern Mediterranean region using the short-period data, although a refinement of the results is expected when applying the method of Mayeda & Walter (1996) using a large data set of broad-band observations.

A pre-requisite for reliable energy estimation is the detailed

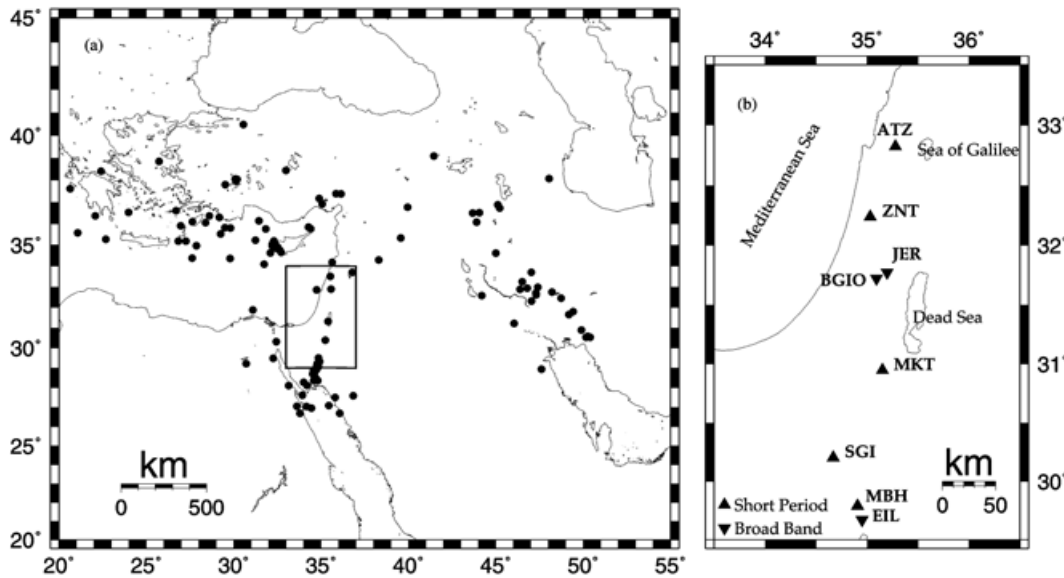

**Figure 1.** (a) Geographical distribution of earthquakes that were used in this study. (b) Location (rectangle in part a) of the three-component short-period seismic stations (solid triangle) and the broad-band stations (inverted triangle).

knowledge of the velocity and attenuation structure. Recent seismic refraction studies of the crust of Israel and Jordan (Ginzburg & Gvirtzman 1979; Ginzburg *et al.* 1979a,b; Makris *et al.* 1983; El-Isa *et al.* 1987; El-Isa 1990) support the view that Israel is a transition zone between the thick continental crust of the Arabian Shield and the relatively thin oceanic or intermediate crust under a relatively thick sedimentary layer of the Eastern Mediterranean Sea (Makris *et al.* 1994).

The goal of this study is to estimate the energy of earthquakes in the Eastern Mediterranean region based on the short-period seismograms recorded by the Israel Seismic Network. Our basic assumption is that the seismic energy estimation, proportional to the integral of the velocity squared, using the method of Kanamori *et al.* (1993) is valid for short distances (up to about 400 km). We empirically determine the distance dependence of the attenuation function, up to a distance of about 1500 km. If the method of Kanamori *et al.* (1993) is valid for short distance, and knowing the dependence of the attenuation on the distance, then we argue that the seismic energy of earthquakes is given by

$$K (\text{integral of } v^2) + (\text{attenuation correction}), \tag{1}$$

where  $K$  is a constant and  $v$  is the velocity. The first term is the Kanamori *et al.* (1993) term and the second is a result of the attenuation property. The validity of the extension of the distance range, for the estimation of the attenuation function, from about 400 km to about 1500 km is extensively discussed below. In the next step we define the seismic energy, based on short-period observations, whilst incorporating the attenuation function. Finally we show the various empirical relationships between the energy and several seismic parameters such as magnitude and seismic moment.

### DATA AND ACQUISITION SYSTEMS

Seismicity in Israel is monitored by the Israel Seismograph Network (ISN; GII Seismological Bulletins 1984–1998), which includes five three-component short-period stations (Fig. 1b,

**Table 1.** ISN stations that were used in this study. Names in italics represent broad-band stations.

| Station     | Latitude (north) | Longitude (east) | Z (km) | Station correction |
|-------------|------------------|------------------|--------|--------------------|
| ATZ         | 32.824           | 35.278           | 0.515  | 1.07               |
| <i>BGIO</i> | 31.722           | 35.092           | 0.760  |                    |
| <i>EIL</i>  | 29.670           | 34.951           | 0.200  |                    |
| JER         | 31.772           | 35.197           | 0.770  |                    |
| MBH         | 29.791           | 34.907           | 0.842  | 0.62               |
| MKT         | 30.948           | 35.151           | 0.517  | 0.83               |
| SGI         | 30.204           | 34.668           | 0.560  | 0.49               |
| ZNT         | 32.238           | 35.031           | 0.313  | 2.75               |

Table 1). Each station is equipped with a 1 Hz natural frequency seismometer, with an effective frequency range from 0.4 Hz up to about 20 Hz. A general description of a short-period station is given by Lee & Stewart (1981), and a similar description of a typical ISN station is given in GII Seismological Bulletins (1984–1998) and by van Eck & Hofstetter (1989). The first ISN broad-band station was installed in 1994. At the beginning of 1999 three broad-band stations operated routinely (Fig. 1b). Each station is composed of a STS2 seismometer with a Quanterra data logger, with a flat response in the frequency range 0.001 Hz to almost 100 Hz. The number of high-quality recordings of broad-band stations that can be used for seismic energy calculation is small, in contrast to the number of short-period recordings (Table 2). Therefore, data of the broad-band stations are used as a complementary source to the short-period observations only in the later stage of the analysis, i.e. seismic moment estimation, and not for the attenuation function.

During 1990–1997 we selected 133 events, based on the catalogue of NEIS, with a high signal-to-noise ratio at a distance range of up to 1500 km (Fig. 1a); the NEIS body wave magnitude range is  $3.0 \leq m_B \leq 6.2$ . Observed earthquakes with a poor signal-to-noise ratio or doubtful identification were rejected (Table 2). We use the body wave magnitude as determined by

**Table 2.** List of earthquakes that were used in this study. For illustrative purposes only,  $\Delta$  and  $\delta$  are the distance and azimuth relative to the centre of the network (approximately BGIO in Table 1). Event names in *italics* (mainly in 1997) represent cases in which we used broad-band observations in addition to short-period observations.

| Event<br>yrmodyhrmn | Latitude<br>°N | Longitude<br>°E | Depth<br>km | $m_B$ | $\delta$ | $\Delta$<br>km | $E_0$<br>erg | $M_0$<br>dyn cm |
|---------------------|----------------|-----------------|-------------|-------|----------|----------------|--------------|-----------------|
| 9002200555          | 32.592         | 44.204          | 37          | 4.6   | 81       | 849            | 3.8e19       | 0.7e23          |
| 9005241512          | 32.944         | 46.801          | 58          | 4.9   | 79       | 1094           | 2.4e19       | 0.2e24          |
| 9008031157          | 32.758         | 48.213          | 45          | 5.0   | 81       | 1225           | 1.2e20       | 1.1e24          |
| 9106192317          | 33.703         | 47.037          | 10          | 4.6   | 75       | 1125           | 6.6e17       | 0.1e24          |
| 9107051352          | 36.727         | 45.219          | 11          | 4.8   | 56       | 1070           | 4.2e17       | 0.2e24          |
| 9107212016          | 36.882         | 45.118          | 33          | 4.3   | 55       | 1070           | 2.1e18       | 0.2e24          |
| 9107240945          | 36.520         | 44.066          | 25          | 5.4   | 54       | 969            | 3.5e20       | 2.2e24          |
| 9110181648          | 33.702         | 36.792          | 10          | 4.9   | 33       | 260            | 1.9e18       | 3.7e22          |
| 9110311435          | 30.541         | 50.163          | 24          | 4.9   | 91       | 1426           | 6.4e20       | 0.3e25          |
| 9111101519          | 30.585         | 50.268          | 43          | 5.0   | 91       | 1436           | 1.9e20       | 0.2e25          |
| 9212110925          | 32.892         | 46.391          | 53          | 4.8   | 80       | 1056           | 8.0e18       | 0.7e23          |
| 9212201037          | 36.078         | 43.896          | 33          | 4.4   | 56       | 931            | 1.7e18       | 0.5e23          |
| 9301151215          | 36.495         | 43.676          | 33          | 4.7   | 53       | 938            | 3.7e19       | 0.1e24          |
| 9301231038          | 32.988         | 47.411          | 33          | 4.7   | 79       | 1151           | 1.5e19       | 0.2e24          |
| 9302012241          | 33.255         | 46.517          | 88          | 4.7   | 78       | 1071           | 1.6e18       | 0.5e24          |
| 9306022201          | 28.940         | 47.606          | 10          | 4.7   | 101      | 1227           | 1.4e19       | 0.3e24          |
| 9306141245          | 32.717         | 47.298          | 33          | 4.8   | 81       | 1139           | 2.5e19       | 0.3e24          |
| 9409271432          | 31.661         | 49.176          | 41          | 4.5   | 86       | 1318           | 3.4e19       | 0.2e24          |
| 9411201431          | 35.335         | 39.557          | 28          | 5.1   | 44       | 563            | 2.7e20       | 1.2e24          |
| 9412030602          | 32.624         | 47.307          | 80          | 4.6   | 81       | 1140           | 1.9e20       | 0.1e25          |
| 9501010851          | 30.543         | 50.396          | 42          | 4.8   | 91       | 1448           | 1.1e20       | 0.2e25          |
| 9501050153          | 28.110         | 33.150          | 6           | 3.4   | 207      | 451            | 1.6e16       | 6.8e20          |
| 9501080219          | 38.440         | 32.980          | 6           | 4.4   | 345      | 770            | 4.4e17       | 1.8e22          |
| 9501090332          | 29.070         | 34.740          | 33          | 3.5   | 189      | 301            | 2.8e15       | 5.7e20          |
| 9501121332          | 32.860         | 34.740          | 9           | 3.0   | 338      | 132            | 5.6e15       | 9.5e20          |
| 9501151707          | 28.360         | 34.820          | 2           | 4.1   | 186      | 377            | 7.8e15       | 1.3e21          |
| 9501210348          | 37.378         | 36.151          | 27          | 4.5   | 7        | 629            | 4.1e17       | 1.7e22          |
| 9502041903          | 35.818         | 29.502          | 43          | 4.1   | 311      | 697            | 5.4e16       | 1.5e22          |
| 9502062115          | 28.930         | 34.740          | 33          | 3.6   | 189      | 316            | 7.3e15       | 2.3e21          |
| 9502101512          | 29.230         | 34.780          | 11          | 3.5   | 189      | 282            | 1.6e15       | 3.8e20          |
| 9502141247          | 35.849         | 34.286          | 33          | 4.4   | 349      | 463            | 1.2e18       | 9.4e21          |
| 9502141338          | 35.770         | 34.410          | 6           | 3.4   | 350      | 452            | 8.6e16       | 2.2e21          |
| 9502181321          | 29.080         | 34.850          | 4           | 3.7   | 187      | 298            | 2.3e15       | 6.3e20          |
| 9502191836          | 27.090         | 35.450          | 6           | 3.4   | 177      | 516            | 1.9e16       | 1.6e21          |
| 9502210356          | 36.089         | 27.635          | 46          | 4.0   | 306      | 852            | 2.1e17       | 2.2e22          |
| 9502232103          | 35.046         | 32.279          | 10          | 5.8   | 323      | 458            | 2.6e20       | 8.1e24          |
| 9502232110          | 34.660         | 32.720          | 4           | 4.6   | 324      | 399            | 1.1e19       | 9.2e22          |
| 9502232140          | 35.043         | 32.314          | 10          | 5.3   | 324      | 455            | 1.8e19       | 2.0e23          |
| 9502232143          | 34.970         | 32.210          | 25          | 4.3   | 322      | 455            | 5.0e17       | 1.8e22          |
| 9502232159          | 35.050         | 32.340          | 25          | 4.1   | 324      | 455            | 1.4e17       | 7.0e21          |
| 9502232212          | 35.201         | 32.304          | 10          | 3.8   | 325      | 470            | 1.6e17       | 4.8e21          |
| 9502232230          | 35.114         | 32.325          | 10          | 4.0   | 324      | 461            | 8.0e16       | 3.3e21          |
| 9502232351          | 35.125         | 32.329          | 22          | 4.0   | 324      | 462            | 2.6e17       | 5.3e21          |
| 9502240008          | 34.860         | 32.450          | 25          | 4.0   | 323      | 432            | 3.6e16       | 2.3e21          |
| 9502240027          | 34.840         | 32.530          | 6           | 4.5   | 324      | 426            | 1.2e19       | 2.2e22          |
| 9502240132          | 35.149         | 32.277          | 10          | 3.7   | 324      | 467            | 6.1e16       | 1.6e21          |
| 9502240242          | 34.910         | 32.510          | 25          | 3.0   | 324      | 433            | 7.6e15       | 6.6e20          |
| 9502240252          | 34.990         | 32.290          | 25          | 3.1   | 323      | 452            | 2.5e16       | 9.1e20          |
| 9502241149          | 35.087         | 32.334          | 10          | 3.3   | 324      | 458            | 3.6e16       | 1.8e21          |
| 9502242023          | 34.850         | 32.450          | 4           | 4.0   | 323      | 431            | 6.1e16       | 2.4e21          |
| 9502242142          | 34.900         | 32.280          | 25          | 3.1   | 322      | 445            | 9.2e15       | 1.3e21          |
| 9502242213          | 34.860         | 32.450          | 4           | 3.0   | 323      | 432            | 1.0e16       | 1.3e21          |
| 9502250047          | 35.055         | 32.348          | 10          | 3.3   | 324      | 455            | 3.0e16       | 7.6e20          |
| 9502250214          | 35.129         | 32.320          | 18          | 3.9   | 324      | 463            | 1.7e17       | 2.0e20          |
| 9502251214          | 34.880         | 32.260          | 25          | 3.0   | 322      | 444            | 1.1e16       | 7.5e20          |
| 9502260453          | 35.031         | 32.196          | 11          | 4.2   | 322      | 461            | 3.8e17       | 3.8e21          |
| 9502260836          | 27.040         | 34.170          | 5           | 4.6   | 191      | 532            | 5.2e18       | 2.2e22          |
| 9502270623          | 35.232         | 31.240          | 10          | 4.4   | 317      | 536            | 2.2e17       | 7.5e21          |
| 9502281256          | 36.305         | 29.176          | 57          | 4.1   | 313      | 754            | 3.0e17       | 1.2e22          |
| 9503010747          | 36.770         | 39.950          | 10          | 4.4   | 36       | 705            | 1.1e18       | 2.8e22          |
| 9503012058          | 34.760         | 32.640          | 5           | 3.1   | 324      | 412            | 2.0e16       | 7.7e20          |

Table 2. (Continued.)

| Event<br>yrmodyhrmn | Latitude<br>°N | Longitude<br>°E | Depth<br>km | $m_B$ | $\delta$ | $\Delta$<br>km | $E_0$<br>erg | $M_0$<br>dyn cm |
|---------------------|----------------|-----------------|-------------|-------|----------|----------------|--------------|-----------------|
| 9503050142          | 35.010         | 32.320          | 25          | 3.2   | 323      | 452            | 3.2e16       | 1.0e21          |
| 9503110904          | 34.621         | 44.996          | 33          | 4.3   | 68       | 962            | 1.2e18       | 0.6e23          |
| 9503150920          | 27.617         | 33.933          | 10          | 3.8   | 195      | 475            | 1.3e18       | 8.2e22          |
| 9504010448          | 31.223         | 46.051          | 33          | 4.6   | 90       | 1027           | 6.6e18       | 9.7e22          |
| 9504050752          | 34.382         | 27.627          | 26          | 4.5   | 294      | 769            | 3.0e18       | 2.6e22          |
| 9504060524          | 27.050         | 33.620          | 5           | 4.2   | 197      | 544            | 2.4e17       | 3.1e21          |
| 9504080825          | 36.140         | 31.442          | 70          | 4.1   | 325      | 600            | 3.5e17       | 8.2e21          |
| 9504132023          | 37.390         | 35.860          | 3           | 4.9   | 4        | 628            | 5.4e17       | 5.6e22          |
| 9504180612          | 31.802         | 49.426          | 18          | 4.9   | 86       | 1341           | 4.1e19       | 0.6e23          |
| 9504190104          | 36.051         | 28.380          | 87          | 3.9   | 308      | 794            | 4.8e17       | 0.2e23          |
| 9504201041          | 26.690         | 36.070          | 1           | 4.2   | 171      | 566            | 9.0e16       | 5.6e21          |
| 9504220021          | 30.892         | 49.908          | 25          | 5.1   | 90       | 1397           | 1.2e20       | 9.8e23          |
| 9504230132          | 33.510         | 35.530          | 33          | 4.1   | 7        | 196            | 3.5e17       | 4.0e21          |
| 9504242317          | 37.169         | 34.893          | 33          | 4.4   | 356      | 602            | 1.4e17       | 1.1e22          |
| 9504261000          | 34.180         | 35.640          | 11          | 4.1   | 7        | 271            | 1.7e17       | 3.1e21          |
| 9504280625          | 34.966         | 27.869          | 23          | 4.3   | 299      | 773            | 5.3e17       | 2.3e22          |
| 9505081908          | 32.900         | 35.570          | 2           | 3.0   | 13       | 131            | 3.6e15       | 2.3e20          |
| 9505111313          | 34.920         | 32.430          | 25          | 3.1   | 324      | 438            | 3.0e16       | 1.0e21          |
| 9505140400          | 28.374         | 34.585          | 10          | 4.3   | 189      | 379            | 1.3e19       | 1.8e23          |
| 9505140437          | 28.470         | 34.700          | 4           | 3.6   | 188      | 367            | 8.1e15       | 1.2e21          |
| 9505140702          | 27.510         | 35.800          | 4           | 4.3   | 173      | 472            | 8.4e16       | 6.0e21          |
| 9505230303          | 35.274         | 22.673          | 16          | 4.5   | 291      | 1230           | 3.8e19       | 1.2e23          |
| 9505290458          | 35.039         | 32.246          | 10          | 5.3   | 323      | 459            | 3.5e19       | 1.1e23          |
| 9506021049          | 35.190         | 26.830          | 25          | 3.6   | 298      | 870            | 2.7e17       | 1.2e22          |
| 9506072309          | 32.461         | 48.737          | 33          | 5.0   | 82       | 1274           | 4.6e19       | 0.9e24          |
| 9506092330          | 28.630         | 34.610          | 2           | 4.2   | 190      | 351            | 4.3e16       | 8.9e21          |
| 9506220526          | 36.910         | 35.058          | 42          | 4.1   | 358      | 572            | 6.1e16       | 3.2e21          |
| 9506270550          | 35.800         | 29.810          | 25          | 3.2   | 313      | 674            | 4.7e15       | 5.0e21          |
| 9506280332          | 28.280         | 34.010          | 5           | 3.5   | 197      | 402            | 7.8e16       | 6.5e20          |
| 9506300534          | 36.366         | 28.609          | 48          | 3.9   | 311      | 798            | 1.3e17       | 2.2e22          |
| 9507030034          | 39.086         | 41.461          | 33          | 4.3   | 32       | 989            | 1.2e18       | 4.1e24          |
| 9507080317          | 29.220         | 30.720          | 6           | 3.7   | 238      | 517            | 1.8e17       | 3.6e21          |
| 9508092030          | 26.690         | 33.790          | 6           | 4.0   | 194      | 578            | 5.2e16       | 1.0e22          |
| 9508151108          | 36.532         | 23.987          | 93          | 3.9   | 300      | 1165           | 4.1e18       | 9.9e22          |
| 9508180544          | 37.802         | 29.517          | 10          | 4.2   | 323      | 851            | 6.5e17       | 8.8e22          |
| 9508220534          | 36.609         | 26.708          | 168         | 5.1   | 306      | 953            | 8.9e18       | 2.7e23          |
| 9508250525          | 31.320         | 35.410          | 19          | 3.2   | 162      | 50             | 1.3e16       | 6.7e20          |
| 9508262042          | 34.630         | 32.100          | 25          | 3.5   | 318      | 433            | 2.2e16       | 3.6e21          |
| 9508281315          | 40.490         | 30.560          | 5           | 4.9   | 337      | 1057           | 1.1e19       | 1.8e23          |
| 9508312305          | 29.280         | 34.870          | 6           | 4.0   | 187      | 276            | 6.5e15       | 1.9e21          |
| 9509010256          | 29.320         | 34.910          | 3           | 3.4   | 186      | 271            | 1.5e15       | 4.4e20          |
| 9509081213          | 29.489         | 32.256          | 10          | 3.9   | 229      | 380            | 6.8e17       | 6.6e21          |
| 9509140553          | 27.590         | 36.840          | 5           | 4.1   | 161      | 485            | 3.8e16       | 1.9e21          |
| 9509181429          | 35.523         | 29.247          | 73          | 4.5   | 308      | 696            | 1.1e18       | 3.5e22          |
| 9509182219          | 32.314         | 47.051          | 33          | 4.3   | 83       | 1115           | 1.9e18       | 1.8e23          |
| 9509242316          | 26.960         | 34.450          | 5           | 4.1   | 188      | 536            | 2.1e16       | 2.9e21          |
| 9509261458          | 38.040         | 30.195          | 20          | 4.8   | 327      | 836            | 2.0e18       | 1.5e23          |
| 9510012221          | 38.063         | 30.093          | 33          | 4.4   | 327      | 843            | 1.7e17       | 1.1e23          |
| 9510031454          | 28.120         | 34.190          | 5           | 4.1   | 194      | 415            | 1.1e16       | 6.7e21          |
| 9510051615          | 37.961         | 30.131          | 33          | 4.7   | 327      | 832            | 5.8e17       | 2.2e23          |
| 9510061616          | 38.000         | 30.146          | 33          | 4.4   | 327      | 835            | 6.7e17       | 1.1e23          |
| 9510170614          | 30.320         | 32.430          | 7           | 3.3   | 240      | 312            | 1.0e16       | 9.7e20          |
| 9510200305          | 35.189         | 27.267          | 33          | 3.9   | 299      | 833            | 1.7e17       | 1.8e22          |
| 9510211400          | 35.760         | 31.830          | 25          | 3.0   | 325      | 545            | 2.2e16       | 5.9e21          |
| 9510310342          | 34.370         | 29.790          | 25          | 4.5   | 301      | 586            | 2.6e18       | 6.6e22          |
| 9511220415          | 28.826         | 34.799          | 10          | 6.2   | 7        | 330            | 6.1e22       | 7.2e26          |
| 9511230522          | 30.400         | 35.240          | 9           | 3.4   | 180      | 149            | 4.7e15       | 1.4e21          |
| 9511240332          | 31.890         | 31.090          | 5           | 4.1   | 273      | 394            | 2.9e18       | 2.5e21          |
| 9512010917          | 28.700         | 34.523          | 10          | 4.4   | 191      | 345            | 1.3e18       | 4.2e22          |
| 9512061757          | 28.862         | 34.679          | 10          | 4.0   | 189      | 324            | 1.1e18       | 7.2e22          |
| 9512080412          | 28.919         | 34.651          | 10          | 4.4   | 190      | 319            | 1.3e18       | 3.4e22          |
| 9512110132          | 28.878         | 34.690          | 10          | 5.0   | 189      | 322            | 2.6e18       | 4.0e23          |
| 9512220549          | 29.510         | 34.860          | 9           | 3.5   | 188      | 251            | 1.3e15       | 3.7e20          |

**Table 2.** (Continued.)

| Event<br>ymodyhrmn | Latitude<br>°N | Longitude<br>°E | Depth<br>km | $m_B$ | $\delta$ | $\Delta$<br>km | $E_0$<br>erg | $M_0$<br>dyn cm |
|--------------------|----------------|-----------------|-------------|-------|----------|----------------|--------------|-----------------|
| 9512312242         | 35.909         | 26.965          | 35          | 4.6   | 303      | 894            | 5.7e17       | 2.2e22          |
| 9612242216         | 34.30          | 38.31           | 29          | 5.1   | 46       | 414            | 3.2e20       | 2.6e24          |
| 9701131019         | 34.09          | 31.74           | 33          | 5.3   | 311      | 408            | 3.1e20       | 1.1e24          |
| 9702281257         | 38.075         | 48.050          | 10          | 5.5   | 56       | 1375           | 9.2e20       | 3.8e26          |
| 9707271007         | 35.582         | 21.064          | 33          | 5.5   | 292      | 1367           | 2.8e20       | 1.7e25          |
| 9710131339         | 36.379         | 22.071          | 24          | 6.2   | 297      | 1305           | 4.2e21       | 3.3e25          |
| 9711052110         | 38.416         | 22.403          | 10          | 5.6   | 306      | 1372           | 1.6e19       | 9.4e24          |
| 9711142138         | 38.855         | 25.735          | 33          | 5.8   | 316      | 1160           | 1.6e20       | 8.8e24          |
| 9711181307         | 37.618         | 20.638          | 33          | 5.9   | 300      | 1473           | 4.7e21       | 2.2e26          |

NEIS, assuming that it is based on many stations in the case of moderate to strong events. We added observations that were not reported by NEIS, but were clearly observed by the Israel Seismic Network (ISN). Normally these were local events ( $\Delta < 400$  km) with relatively low magnitude ( $m_B < 4.0$ ), where the magnitude determination (Shapira 1988) is based on coda measurements. The  $m_B$  ISN is calibrated to be equal to  $m_B$  NEIS (Shapira 1988). During this period, a strong earthquake ( $M_W = 7.2$ ) occurred in the Gulf of Aqaba and was followed by an intense earthquake swarm. In order to avoid biasing the result, we use only the main shock on 1995 November 22 and the four strongest aftershocks that occurred shortly afterwards.

The propagation of  $S_n$  and  $L_g$  waves in the Eastern Mediterranean region is rather complex, including areas of efficient and inefficient paths (Rodgers *et al.* 1997; Sandvol *et al.* 1998; Thio *et al.* 1998). Generally the Mediterranean Sea and the Red Sea are characterized by inefficient  $L_g$  propagation, whilst the Arabian Shield is characterized by an efficient path. Efficient  $S_n$  propagation is found for the surrounding regions of the Arabian Shield and the Mediterranean. Inefficient  $S_n$  propagation coincides with a zone of low  $P_n$  velocity, that is, the Turkish and northern Iranian plateaux or across the Dead Sea fault. Fig. 2 illustrates an event that was observed at the station MKT E–W component, located at about 630 km away

Nov. 20 1994 14:31,  $m_B = 5.1$ , MKT,  $\delta = 44^\circ$ ,  $\Delta = 630$  KM

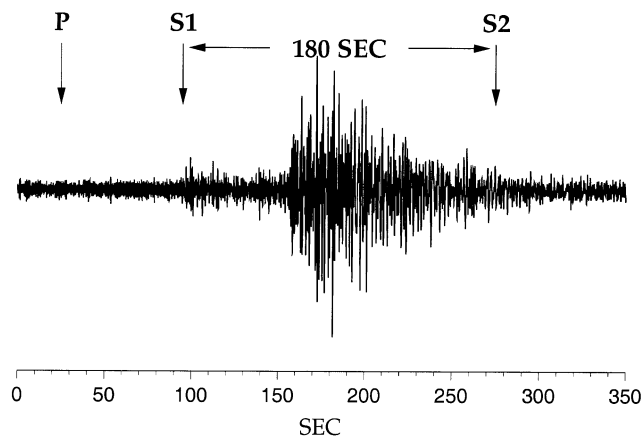

**Figure 2.** An example of the data used, which were observed at station MKT, E–W component, located at about 630 km away from the epicentre (event no. 19 in Table 2). P denotes the P phase, S1 and S2 define the starting and endpoints of the window used for the energy estimation.

from the earthquake (event no. 19, Table 2). The manually determined window (between S1 and S2) includes all the energy of the  $S_n$  and  $L_g$  waves until the amplitude of the signal is essentially the same as that of the background noise (signal-to-noise ratio,  $SNR < 2$ ). The signal shows poor  $S_n$  and efficient  $L_g$  propagation in agreement with the observations of Rodgers *et al.* (1997), Sandvol *et al.* (1998) and Thio *et al.* (1998).

## ATTENUATION FUNCTION

Our first step is to estimate empirically the attenuation as a function of the distance, in the frequency band of the short-period observations (right term in eq. 1). In the following step we determine the seismic energy. We assume that in this frequency band the attenuation is a property of the medium and is independent of the magnitude of the earthquakes and the azimuth. This simplifying assumption can be erroneous, since with an  $m_B$  range of roughly 3–6 there is potential for a significant range in the dominant signal frequency, which may affect the attenuation function. Below we conduct several tests to check the validity of this assumption. For a given event, observed by a series of stations, we search for an attenuation curve that provides the best fit to the seismic energy–distance relationship. It is a relationship of the type  $n \log R + kR \log e + \log s_i$ , where  $k$  and  $n$  are constants,  $R$  is the hypocentral distance ( $R^2 = \Delta^2 + h^2$ ) in the distance range of  $50 \leq R \leq 1500$  km,  $\Delta$  is the epicentral distance,  $h$  is the source depth (5–20 km for most of the events; estimated error depth is less than 10 km),  $s_i$  is the station correction (Table 1) of the  $i$ th station,  $i = 1, 2, \dots, N_s$ , and  $N_s$  is the number of stations. Since we assume that the attenuation is independent of the magnitude, in the frequency band of the short-period observations, we obtain a set of parallel curves, all having the same attenuation property. Essentially, the attenuation curve is determined using many points from a relatively short distance of about 50 km to a far distance of up to 1500 km, which in turn assures the validity of our assumption. The distribution of these observation points with distance is fair and sufficient to obtain an unbiased and reliable estimate of the earthquake energy. We note that in other studies the attenuation relationship was determined for a relatively large distance range. In this example, the distance range applied in the regression, based on least-squares fits, executed by Shapira (1981) for Nevada nuclear explosions observed at WWSSN was up to 1000 km, and that of Hutton & Boore (1987), using a simple two-parameter regression, for earthquakes in southern California was up to 700 km.

We applied a two-step regression method, similar to that of

Joyner & Boore *et al.* (1981), for the attenuation function estimation (second term in eq. 1). Based on all observations, we incorporate the results of the regression  $n$ ,  $k$  and  $S_i$  to obtain the attenuation function:

$$(1.850 \pm 0.005) \log R + (0.00460 \pm 0.00005) R \log e + 0.05. \quad (2)$$

Since all the earthquakes occurred at shallow depths, the contribution of the depth is minor. The standard deviation of eq. (2) is 0.24 (or an uncertainty factor of 1.7). We have assumed that the attenuation property, in the frequency band of the short-period observations, is independent of the magnitude and source-to-station azimuth. We executed several regressions to verify this assumption (Fig. 3a). In the first test we limited ourselves to

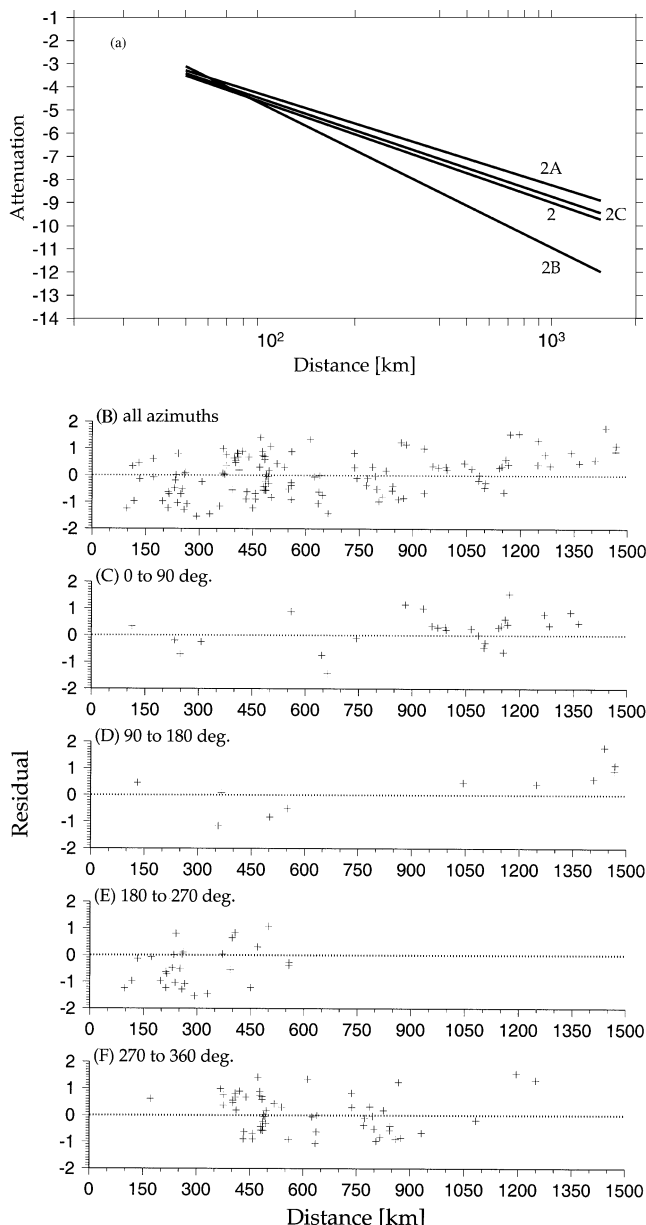

**Figure 3.** (a) Attenuation curves (dB) as a function of distance; the numbers close to the lines refer to the equations in the text. Residual of the attenuation versus the distance, binned by the azimuth: (b) all azimuths; (c) azimuthal gap  $0^\circ$ – $90^\circ$ ; (d) azimuthal gap  $90^\circ$ – $180^\circ$ ; (e) azimuthal gap  $180^\circ$ – $270^\circ$ ; (f) azimuthal gap  $270^\circ$ – $360^\circ$ . Distance was calculated relative to the centre of the seismic network.

a distance of up to 500 km regardless of the source-to-station azimuth, and we obtained the attenuation function

$$(1.96 \pm 0.0004) \log R + (0.00530 \pm 0.00005) R \log e + 0.06; \quad (2A)$$

the standard deviation is 0.29. It is obvious that the results are dominated by the events that occurred south or west of the observing stations. In the other test we compared two main paths, namely, a continental path associated with events that occurred in the Arabian Shield east of the observing stations (Fig. 1), and to the west, an intermediate to oceanic path underlain by a thick sedimentary layer (Makris *et al.* 1994) associated with events that occurred in the Eastern Mediterranean. We limited ourselves to epicentres within a distance of 500 km. For the continental path, associated with efficient  $L_g$  propagation, we obtained (Fig. 3a)

$$(1.652 \pm 0.020) \log R + (0.0113 \pm 0.003) R \log e + 0.08. \quad (2B)$$

The relatively large standard deviation of 0.51 is probably due to the small number of events (only eight). Extending the distance to about 1500 km yields a similar attenuation function with smaller standard deviation of 0.40. For the oceanic path, associated with efficient  $S_n$  propagation, we obtained (Fig. 3a)

$$(1.911 \pm 0.005) \log R + (0.00512 \pm 0.00005) R \log e + 0.06; \quad (2C)$$

the standard deviation is 0.23. Extending the distance to about 1000 km yields a similar attenuation function and slightly smaller standard deviation of 0.22. Despite the different propagation paths of the waves, travelling through the continental crust of the Arabian Shield to the east or the intermediate crust of the Mediterranean Sea to the west, it is clear that from a statistical point of view that they are rather similar. Thus we can conclude that eq. (2) serves as a representative attenuation function for the region (see Fig. 3a).

Figs 3(b)–(f) illustrate the residual of the attenuation as a function of the distance, which was also binned by azimuth, including the station correction (Table 1). Cases B (all directions), C ( $0^\circ$ – $90^\circ$ ) and F ( $270^\circ$ – $360^\circ$ ), which have a reasonable distribution of earthquake location relative to the observing stations with distance, suggest no distance dependence up to a distance of 1200 km, and a probable slight dependence beyond that up to a distance of 1500 km. Cases D ( $90^\circ$ – $180^\circ$ ) and E ( $180^\circ$ – $270^\circ$ ), although containing a relatively small number of events and limited to a distance range of 100 km to almost 600 km, respectively, suggest a similar behaviour. In order to investigate the distance dependence of the attenuation function for distances beyond 1200 km, we applied the  $t$  distribution (Jeffreys 1967) for several cases. For the cases B (all azimuths; essentially cases C and D), C ( $0^\circ$ – $90^\circ$ ), and D ( $90^\circ$ – $180^\circ$ ), which include a small number of degrees of freedom—9, 3 and 4 respectively—we obtained  $t$ -values of 6, 4 and 5, respectively, implying a probability of about 0.99. Thus, it appears as if there is distance dependence beyond a distance of 1200 km. Since the number of degrees of freedom is rather small, it is obvious that more observations in this distance range are needed to verify that we did not encounter a rare statistical case.

## ENERGY DETERMINATION AND ENERGY–MAGNITUDE RELATIONSHIP

Once we determine the attenuation function we can estimate the energy observed at each station of a given event. We need

to execute the time-domain integration of the sum squared ground-motion velocity of the  $S$  wave, in a similar manner to the procedure proposed by Kanamori *et al.* (1993). The seismic energy observed at a given station starting at the  $S$  wave,  $E_S$ , using a window that includes all or most of the  $S$ -wave energy is

$$E_S = \frac{4\pi\rho_0\beta}{C_f^2} \int \sum v_S^2 dt = 30.5 \times 10^5 \int \sum v_S^2 dt, \quad (3)$$

neglecting the  $P$ -wave energy since it is a small fraction ( $\approx 4$  per cent) of the  $S$ -wave energy (Haskell 1964), where  $v_S$  is the particle motion velocity at the station,  $\rho_0$  is the mass density of  $2.5 \text{ g cm}^{-3}$ ,  $C_f$  is the free-surface amplification factor of 2,  $\beta$  is the  $S$ -wave velocity of  $3.6 \text{ km s}^{-1}$  (Ginzburg *et al.* 1979a,b) and  $E_S$  is given in ergs. The magnitude of most of the events is  $m_B \geq 3.5$  or the corner frequency  $f_0 \leq 2 \text{ Hz}$ . In the case of the relatively small events with  $M_0 \approx 10^{21} \text{ dyn cm}$  and  $\Delta\sigma \approx 10 \text{ bars}$  (Table 2; see also Shapira & Hofstetter 1992), we obtain  $f_0 \approx 3 \text{ Hz}$ . Thus, in order to estimate 80 per cent of the radiated energy (Singh & Ordaz 1994), the upper boundary of the frequency range over which the integration is being executed should be up to  $f=6f_0$ . This range is included within the effective frequency range of the ISN seismometers (see Lee & Stewart 1981; van Eck & Hofstetter 1989).

The second step of the regression is the determination of the seismic energy–magnitude relationship, after considering the attenuation correction due to the distance. The energy at the source,  $E_0$ , was calculated using eqs (2) and (3). The correlation with the body wave magnitude  $m_R$  is

$$\log E_0 = (2.09 \pm 0.10)m_B + (8.86 \pm 0.42). \quad (4)$$

The standard deviation in estimating  $\log E_0$  is 0.78 (Fig. 4). In this regression, and also in those below, we take into account

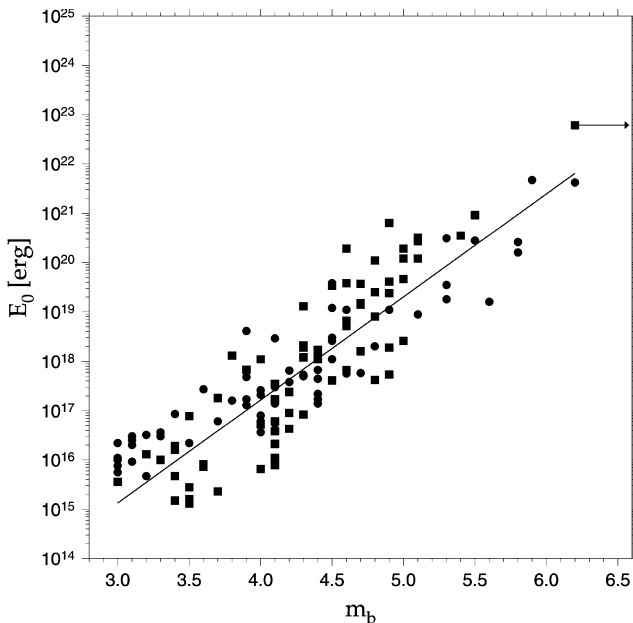

**Figure 4.** Energy as a function of body wave magnitude,  $m_B$ , obtained using the three-component short-period seismograms. Solid circles represent observations with oceanic paths and solid squares represent observations with continental paths (this is the same in all the other figures).

the fact that both  $m_B$  and  $E_0$  are subject to errors, in a manner that is described by Draper & Smith (1981, Chapter 2). The latter showed that the fitting is adequate, since the spread in  $m_B$  is large compared with the spread of errors. In Fig. 4, and also in the remaining figures, we distinguished between earthquakes that are characterized by continental paths and those that are characterized by oceanic paths. We did not observe any trend due to the different paths. The energy–magnitude relationship is similar to those obtained by Thatcher & Hanks (1973) and Kanamori *et al.* (1993) for earthquakes in California. The 1995 November 22 event with  $m_B = 6.2$  (the one with the arrow in Fig. 4) reflects the known  $m_B$  saturation at high values of body wave magnitude (Thatcher & Hanks 1973; Hanks & Kanamori 1979). It should be noted that assuming a high-order dependence on  $m_B$  would not significantly reduce the scatter in  $E_0$ . As discussed below, use of the moment magnitude,  $M_W$ , is preferred over the body wave magnitude, which reaches saturation at high values.

### SEISMIC MOMENT AND STRESS DROP ESTIMATION

Our next step is to examine the relationships between the seismic energy and various seismic parameters, such as magnitude and seismic moment. We calculated the seismic moment (based on the dislocation model of Brune 1970) using the ISN observations (Shapira & Hofstetter 1992). The empirical regression between  $M_0$  and  $m_B$  is

$$\log M_0 = (1.59 \pm 0.07)m_B + (15.63 \pm 0.28), \quad (5)$$

where  $M_0$  is in dyn cm, the body wave magnitude range is  $3.0 \leq m_B \leq 6.2$ , and the observed standard deviation is 0.51 (Fig. 5). Combining eqs (4) and (5) we find that the relationship of seismic energy to seismic moment is  $E_0 \propto M_0^{1.3}$ , implying dependence on the size of the earthquake.

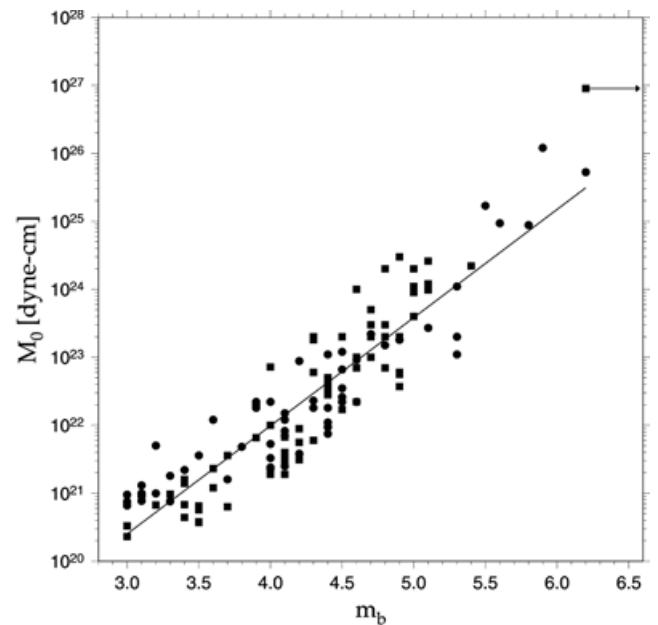

**Figure 5.** The relationship between the seismic moment and the body wave magnitude.

Orowan (1960) suggested a simple faulting model in which the stress drop  $\Delta\sigma$  is from an initial stress  $\sigma_0$  to a final stress  $\sigma_1$  with a frictional stress  $\sigma_f$ . If the final stress is equal to the frictional stress, we obtain

$$\frac{E_0}{M_0} = \frac{\Delta\sigma}{2\mu}, \quad (6)$$

where  $\mu$  is the rigidity. Following Orowan's (1960) model we plot lines of constant stress drop between 3 and 300 bars (Fig. 6). The seismic energy increases with  $M_0$  following the relationship

$$\log E_0 = (1.19 \pm 0.04) \log M_0 - (8.81 \pm 0.83), \quad (7)$$

where the standard deviation of  $\log E_0$  is 0.47. Several points should be mentioned here. The first is that the seismic energy increases with  $M_0$ , following the relationship  $E_0 \propto M_0^{1.19}$ , similar to above-mentioned value. The second point is that the Orowan stress drop varies from 1 bar to about 300 bars. Moreover, it implies that the Orowan stress drop increases with the seismic moment as  $M_0^{0.19}$ . We did not observe any azimuthal dependence, and thus we believe that it is a source effect. This phenomenon is in a good agreement with the recent studies of Thio (1995) for earthquakes in southern California, Mayeda & Walter (1996) for earthquakes in western USA and Castro *et al.* (1997) for the Friuli 1976 earthquake sequence in Italy.

Kanamori (1977), using a global earthquake data set, and Hanks & Kanamori (1979), using earthquakes in California, proposed the relationship  $\log M_0 = 1.5M_W + 16.1$ , where  $M_W$  is the moment magnitude. Recently, Shapira & Hofstetter (1992) showed that this relationship holds for earthquakes in Israel and adjacent regions. Based on this relationship, and following the definition of energy-based magnitude  $M_E$  of Kanamori (1977) and Mayeda & Walter (1996), we obtain

$$M_E = \frac{2}{3} \log_{10} E_0 - 7.87, \quad (8)$$

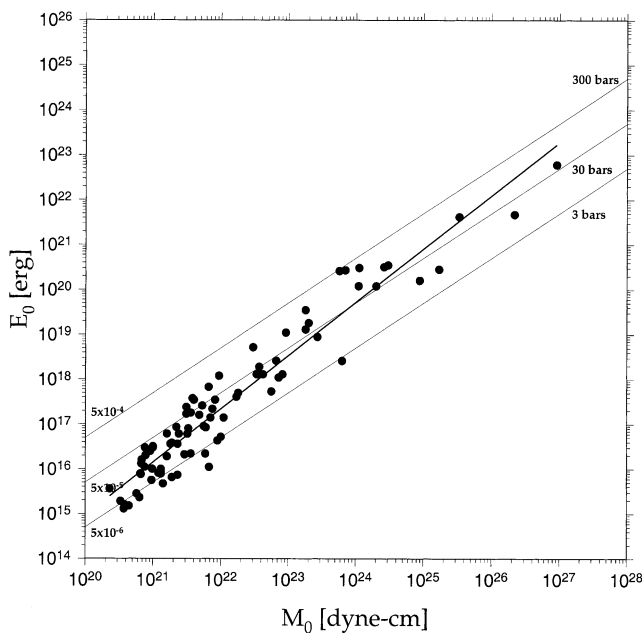

Figure 6. The energy release versus the seismic moment.

which is simply related to the moment magnitude  $M_W$ :

$$M_E = M_W + \frac{2}{3} \log_{10} \left( \frac{\Delta\sigma}{2\mu} \right) + 2.87. \quad (9)$$

Kanamori (1977) and Mayeda & Walter (1996) showed that the main advantage in using both magnitude scales is that they are based on physical quantities that will not saturate. Whilst the estimation of the seismic moment is a relatively straightforward procedure, the seismic energy estimation is more complicated since it is dependent on the timescale of the energy release. Fig. 7 presents the relationship between  $M_E$  and  $M_W$  for the events in the data set, where the magnitude values were independently determined from the seismograms. The results suggest that the stress drop increases with moment for relatively low values of  $M_W < 5$  and remains relatively constant for values of  $M_W > 5.5$ .

We estimate the stress drop of earthquakes  $\Delta\sigma$ , based on the dislocation model of Brune (1970), using the equation  $\Delta\sigma = 8.47 M_0 f_0^3 / \beta^3$ , where  $f_0$  is the corner frequency. Shapira & Hofstetter (1992) give details of the application of the method in the case of seismograms observed by the ISN (short period or broad band). In the case of strong earthquakes ( $m_B > 5.0$ ), we use broad-band observations for calculating the stress drop. The stress drop clearly increases with increasing seismic moment (Fig. 8) or with seismic energy (Fig. 9) up to about 30 bars. On the other hand, relatively large values ( $> 40$  bars) are less common and there is no clear correlation between these values and the energy or seismic moment. The relatively large values of stress drop ( $> 100$  bars) are associated with seismic activity in the Hellenic or Cyprean arcs and the Zagros Mountains.

We compare the relationship of energy to seismic moment following the Orowan (1960) model (eq. 6) with the apparent stress  $\sigma_a = \mu E_0 / M_0$  (Wyss 1970) to obtain  $\sigma_a = \Delta\sigma / 2$  (Vassiliou & Kanamori 1982; Singh & Ordaz 1994; Castro *et al.* 1997) and presented in Fig. 10(a). A high proportion of the earthquakes surrounds the line  $\sigma_a = \Delta\sigma / 2$ , suggesting a complete stress drop

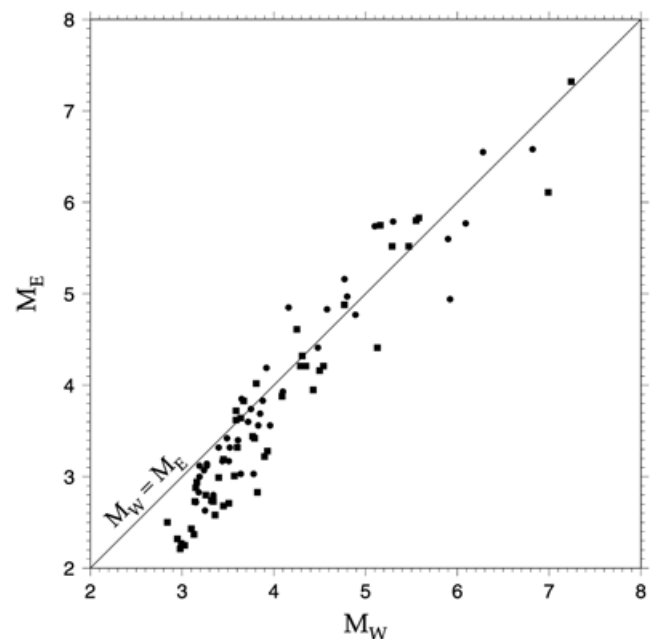

Figure 7. The relationship between  $M_E$  and  $M_W$  for the observed earthquakes.



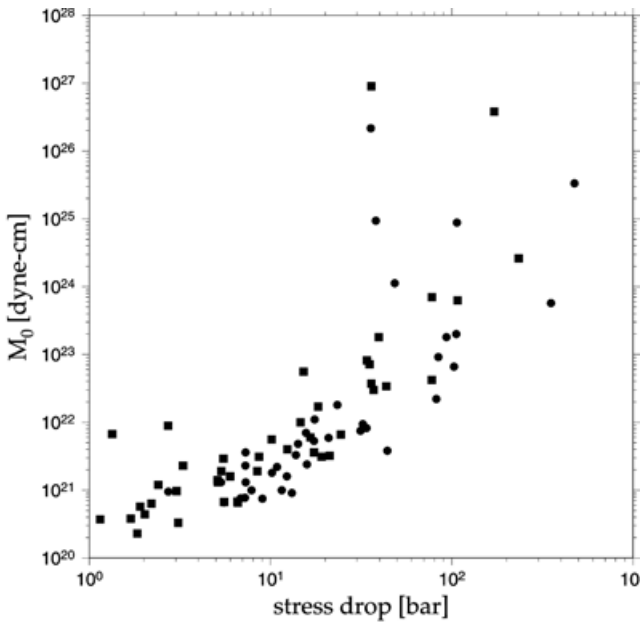

**Figure 8.** The relationship between Brune's stress drop  $\Delta\sigma$  and the seismic moment  $M_0$  for the events in this study.

following Orowan's model. The scattering in the seismic energy estimation (eq. 7) can explain the deviation of the nearby points from this line. Generally, the distribution of the points on both sides of the line  $\sigma_a = \Delta\sigma/2$ , and especially the distant ones, appears to be non-uniform, which suggests neither the situation  $\sigma_a > \Delta\sigma/2$ , the case of the partial stress drop model (Brune 1970), or the opposite case of  $\sigma_a < \Delta\sigma/2$ , which is the overshoot model (Savage & Wood 1971). The results were sorted into several groups according to the tectonic regions, that is the Eastern Mediterranean region, the Arabian Shield

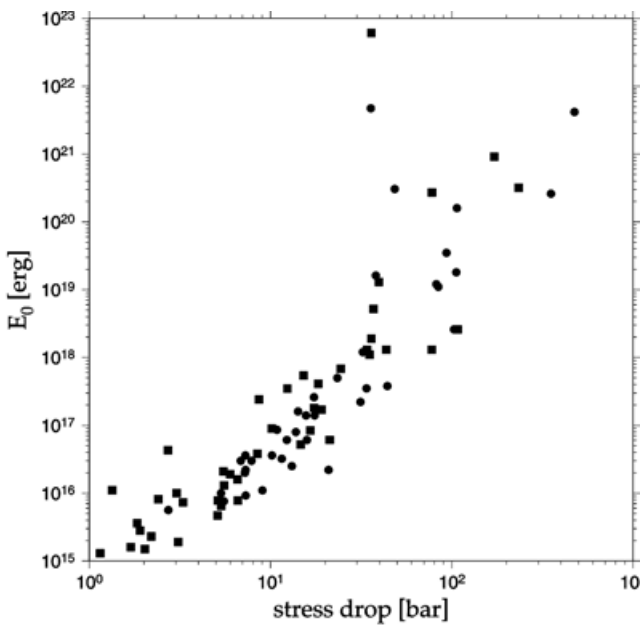

**Figure 9.** The relationship between Brune's stress drop  $\Delta\sigma$  and the seismic energy  $E_0$  for the events in this study.

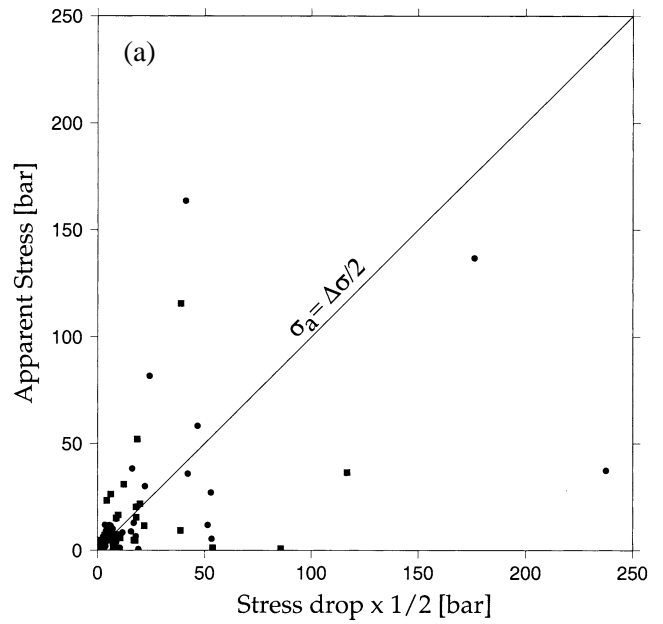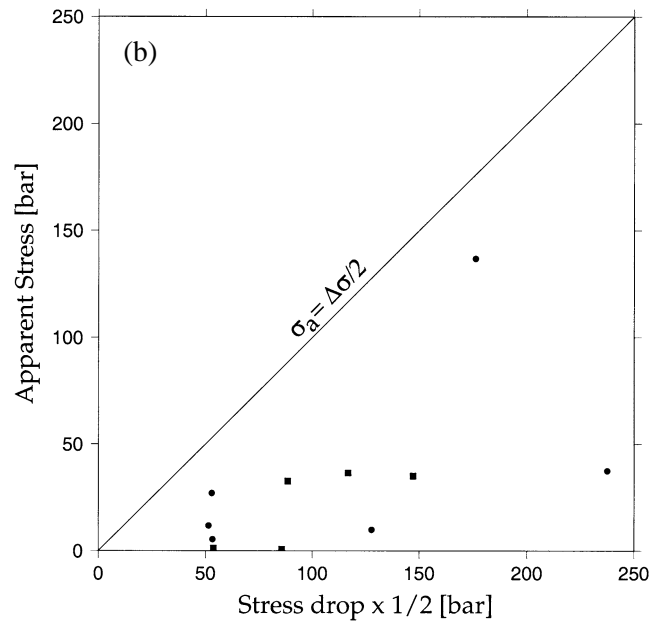

**Figure 10.** (a) Stress drop (half-value) versus apparent stress for all the earthquakes in this study. (b) Using only the earthquakes with large stress drop ( $> 100$  bars) in the Hellenic Arc and the Zagros Mountains.

and the Dead Sea rift, including the Gulf of Aqaba and the Red Sea. We did not observe any obvious pattern characterizing any of these regions. We performed another test selecting only the earthquakes with large values of stress drop ( $> 100$  bars), which included the events in the Hellenic or Cyprian arcs and the Zagros Mountains. Those regions are characterized by a compressional regime (McKenzie 1978; Jackson & McKenzie 1988). In this case we obtained a clear distribution of  $\sigma_a < \Delta\sigma/2$  (Fig. 10b), favouring the overshoot model (Savage & Wood 1971). Results of other studies do not provide conclusive answers. For example, Singh & Ordaz (1994) reported that for Mexican data the Brune spectra in the frequency range  $1 < f < 10$  Hz, assuming a complete stress drop of  $\approx 120$  bars,

fit the observed spectra well, and the median apparent stress is 24 bars. Mayeda & Walter (1996), using Californian data, could not fit a simple comparison of dynamic and static stress drops. Castro *et al.* (1997), using Friuli data, observed that most of the events seem to follow the partial stress drop model (Brune 1970).

## CONCLUSIONS

We estimated the energy radiated by earthquakes that occurred in the Eastern Mediterranean region at varying distances, using the observed seismograms of short-period observations of the ISN. The attenuation function is determined to be  $(1.850 \pm 0.005) \log R + (0.00460 + 0.00005)R \log e + 0.05$  for the distance range  $50 \leq R \leq 1500$  km. The seismic energy estimation based on the method of Kanamori *et al.* (1993) is proportional to the integral of the velocity squared. The dependence of the attenuation function on the azimuth and distance is tested. From a statistical point of view we obtain similar results, despite the different propagation paths of the waves, travelling through the intermediate crust of the Mediterranean Sea to the west or the continental crust of the Arabian Shield to the east. For the magnitude range  $3.0 \leq m_B \leq 6.2$ , we obtained the magnitude–energy relationship  $\log E_0 = (2.09 \pm 0.10)m_B + (8.86 \pm 0.42)$ . The seismic energy increases with seismic moment approximately as  $M_0$ , following the relationship  $E_0 \propto M_0^{1.19}$ , and the Orowan stress drop increases with moment as  $M_0$ , following the relationship  $M_0^{0.19}$ , which is in general agreement with other recent studies.

## ACKNOWLEDGMENTS

D. Kadosh, D. Levi, U. Peled and Y. Schwartz kept the ISN operating. C. Ben-Sasson, L. Feldman and B. Reich carried out the initial data processing. This study is supported by the Earth Science Research Administration, Ministry of the National Infrastructure. Figures in this report were prepared using the GMT program (Wessel & Smith 1991).

## REFERENCES

- Bath, M., 1966. Earthquake energy and magnitude, in *Contributions in Geophysics: In Honor of Beno Gutenberg*, eds Benioff, M.E., Howell, B.F. & Press, F., Pergamon Press, New York.
- Boatwright, J. & Choy, G., 1986. Teleseismic estimates of the energy radiated by shallow earthquakes, *J. geophys. Res.*, **91**, 2095–2112.
- Brune, J., 1970. Tectonic stress and the spectra of seismic shear waves from earthquakes, *J. geophys. Res.*, **73**, 4997–5009.
- Castro, R., Pacor, F. & Petrongaro, C., 1997. Determination of S-wave energy release of earthquakes in the region of Friuli, Italy, *Geophys. J. Int.*, **128**, 399–408.
- Draper, N. & Smith, H., 1981. *Applied Regression Analysis*, 2nd edn, John Wiley and Sons, New York.
- El-Isa, Z., 1990. Lithospheric structure of the Jordan-Dead Sea transform from earthquake data, *Tectonophysics*, **180**, 29–36.
- El-Isa, Z., Mechie, J., Prodehl, C., Makris, J. & Rihm, R., 1987. A crustal structure study of Jordan derived from seismic refraction data, *Tectonophysics*, **138**, 235–253.
- GII Seismological Bulletins, 1984–98. *Earthquakes in and Around Israel*, Vol. 3–14, Seismological Division, Institute for Petroleum Research and Geophysics, Holon, Israel.
- Ginzburg, A. & Gvirtzman, G., 1979. Changes in the crust and in the sedimentary cover across the transition from the Arabian Platform to the Mediterranean Basin: evidence from seismic refraction and sedimentary studies in Israel and Sinai, *Sed. Geol.*, **23**, 19–36.
- Ginzburg, A., Makris, J., Fuchs, K., Perathoner, B. & Prodehl, C., 1979b. Detailed structure of the crust and upper mantle along the Jordan-Dead Sea rift, *J. geophys. Res.*, **84**, 5605–5612.
- Ginzburg, A., Makris, J., Fuchs, K., Prodehl, C., Kaminski, W. & Amitai, U., 1979a. A seismic study of the crust and upper mantle of the Jordan-Dead Sea rift and their transition toward the Mediterranean Sea, *J. geophys. Res.*, **84**, 1569–1582.
- Gutenberg, B. & Richter, C., 1942. Earthquake magnitude, intensity, energy and acceleration, 1, *Bull. seism. Soc. Am.*, **32**, 163–191.
- Gutenberg, B. & Richter, C., 1956a. Earthquake magnitude, intensity, energy and acceleration, *Bull. seism. Soc. Am.*, **46**, 105–145.
- Gutenberg, B. & Richter, C., 1956b. Magnitude and energy of earthquakes, *Ann. Geophys.*, **9**, 1–15.
- Hanks, T.C. & Kanamori, H., 1979. A moment magnitude scale, *J. geophys. Res.*, **84**, 2348–2350.
- Haskell, N., 1964. Total energy and energy spectral density of elastic wave radiation from propagating faults, *Bull. seism. Soc. Am.*, **56**, 1811–1842.
- Hutton, K. & Boore, D., 1987. The  $M_L$  scale in Southern California, *Bull. seism. Soc. Am.*, **77**, 2074–2094.
- Jackson, J. & McKenzie, D., 1988. The relationship between plate motions and moment tensors, and the rates of active deformation in the Mediterranean and Middle East, *Geophys. J. Int.*, **93**, 45–73.
- Jeffreys, H., 1967. *Theory of Probability*, Oxford University Press, London.
- Joyner, W. & Boore, D., 1981. Peak horizontal acceleration and velocity from strong-motion records, including records from the 1979 Imperial Valley, California, earthquake, *Bull. seism. Soc. Am.*, **71**, 2011–2038.
- Kanamori, H., 1977. The energy release in great earthquakes, *J. geophys. Res.*, **82**, 2981–2987.
- Kanamori, H., Mori, J., Hauksson, E., Heaton, T., Hutton, K. & Jones, L., 1993. Determination of earthquakes energy release and  $M_L$  using TERRASCOPE, *Bull. seism. Soc. Am.*, **83**, 330–346.
- Lee, W.H.K. & Stewart, S., 1981. *Principles and Applications of Microearthquake Network*, Academic Press, New York.
- Lindensfeld, M. & Berckhemer, H., 1995. Seismic energies of earthquakes and relationships to other source parameters, *Tectonophysics*, **248**, 171–184.
- Makris, J., Ben-Avraham, Z., Behle, A., Ginzburg, A., Giese, P., Steinmetz, L., Whitmarsh, R. & Eleftheriou, S., 1983. Seismic refraction profiles between Cyprus and Israel and their interpretation, *Geophys. J. R. astr. Soc.*, **75**, 575–591.
- Makris, J., Wang, S., Odintsov, S. & Udintsev, G., 1994. The magnetic field of the Eastern Mediterranean Sea, in *Geological Structure of the Northern Mediterranean*, pp. 75–87, eds Krasheninnikov, V. & Hall, J., Historical Productions–Hall, Jerusalem.
- Mayeda, K. & Walter, R., 1996. Moment, energy, stress drop, and source spectra of Western United States earthquakes from regional coda envelopes, *J. geophys. Res.*, **101**, 11 195–11 208.
- McKenzie, D., 1978. Active tectonics of the Alpine–Himalayan belt: the Aegean Sea and surrounding regions, *Geophys. J. R. astr. Soc.*, **55**, 217–254.
- Orowan, E., 1960. Mechanism of seismic faulting, *Geol. Soc. Am.*, **79**, 323–345.
- Rodgers, A., Ni, J. & Hearn, T., 1997. Propagation characteristics of short-period  $S_n$  and  $L_g$  in the Middle East, *Bull. seism. Soc. Am.*, **87**, 396–413.
- Sandvol, E., Seber, D., Barazangi, M., Mohamad, R., Türkelli, N., Gürbüz, C., Zor, E. & Gök, R., 1998. Seismological research in the Middle East, in *Proc. 20th Ann. seism. Res. Symp. on CTBT*, pp. 526–535, eds Fantroy, J., Heatley, D., Warren, J., Chavez, F. & Meade, C., Santa-Fe.

- Savage, J. & Wood, M., 1971. The relation between apparent stress and stress drop, *Bull. seism. Soc. Am.*, **61**, 1381–1388.
- Shapira, A., 1981. Regional coda magnitudes of underground nuclear explosions, *Phys. Earth planet. Inter.*, **26**, 188–197.
- Shapira, A., 1988. Magnitude scales for regional earthquakes monitored in Israel, *Isr. J. Earth Sci.*, **37**, 17–22.
- Shapira, A. & Hofstetter, A., 1992. Source parameters and scaling relationships of earthquakes in Israel, *Tectonophysics*, **217**, 217–226.
- Shaw, B., 1998. Far-field radiated energy scaling in elastodynamic earthquake fault models, *Bull. seism. Soc. Am.*, **88**, 1457–1465.
- Singh, S. & Ordaz, M., 1994. Seismic energy release in Mexican subduction zone earthquakes, *Bull. seism. Soc. Am.*, **84**, 1533–1550.
- Thatcher, W. & Hanks, T., 1973. Source parameters of southern California earthquakes, *J. geophys. Res.*, **78**, 8547–8576.
- Thio, H.-K., 1995. Using short-period surface waves to study seismic source and structure, *PhD thesis*, California Inst. Technology, CA.
- Thio, H.-K., Saikia, C., Woods, B., Helmberger, D. & Hofstetter, R., 1998. Path calibration for broadband IMS stations in the Mediterranean region, North Africa and the Middle East, in *Proc. 20th Ann. seism. Res. Symp. on CTBT*, pp. 146–155, eds Fantroy, J., Heatley, D., Warren, J., Chavez, F. & Meade, C., Santa-Fe.
- Van Eck, T. & Hofstetter, A., 1989. Microearthquake activity in the Dead Sea region, *Geophys. J. Int.*, **99**, 605–620.
- Vassiliou, M.S. & Kanamori, H., 1982. The energy release in earthquakes, *Bull. seism. Soc. Am.*, **72**, 371–387.
- Wessel, P. & Smith, W., 1991. Free software helps maps and display data, *EOS, Trans. Am. geophys. Un.*, **72**, 441.
- Wyss, M., 1970. Stress estimates for South American shallow and deep earthquakes, *J. geophys. Res.*, **75**, 1529–1544.
